# Supplementary material
Source: publisher figshare collection journal article supplement (https://acs.figshare.com/ndownloader/files/11095370)
Supplement: Supplementary file 1 [file 11095370]

# Supplementary Information for “Stabilization Mechanism of the Tetragonal Structure in a Hydrothermally Synthesized BaTiO<sub>3</sub> Nanocrystal”

Kenta Hongo,<sup>\*,†,@</sup> Sinji Kurata,<sup>¶</sup> Apichai Jomphoak,<sup>§</sup> Miki Inada,<sup>||</sup> Katsuro Hayashi,<sup>¶</sup> and Ryo Maezono<sup>⊥</sup>

<sup>†</sup>*Research Center for Advanced Computing Infrastructure, JAIST, Asahidai 1-1, Nomi, Ishikawa 923-1292, Japan*

<sup>‡</sup>*Computational Engineering Applications Unit, RIKEN, 2-1 Hirosawa, Wako, Saitama 351-0198, Japan*

<sup>¶</sup>*Department of Applied Chemistry, Faculty of Engineering, Kyushu University, Fukuoka 819-0395, Japan*

<sup>§</sup>*National Electronics and Computer Technology Center (NECTEC), 112 Phahon Yothin, Klong Luang, Pathumthani 12120, Thailand*

<sup>||</sup>*Center of Advanced Instrumental Analysis, Kyushu University*

<sup>⊥</sup>*School of Information Science, JAIST, Asahidai 1-1, Nomi, Ishikawa 923-1292, Japan*

<sup>#</sup>*National Institute for Materials Science (NIMS), 1-2-1 Sengen, Tsukuba, Ibaraki 305-0047, Japan*

<sup>@</sup>*PRESTO, JST, 4-1-8 Honcho, Kawaguchi, Saitama 332-0012, Japan*

E-mail: kenta\_hongo@mac.com

# Modelling

This supporting information gives all the possible patterns of *cis*- and *trans*-configurations in  $\text{Ba}_{1-0.5x}\text{TiO}_{3-x}\text{OH}_x$  supercells with stoichiometric substitutions of  $x = 0.07/0.17/0.50/0.67$ , while only the most stable configurations for each of the substitutions are given in the maintext. Figures S-1, S-2, S-3, and S-4 correspond to the supercells of  $x = 0.07, 0.17, 0.50$  and  $0.67$ , respectively.

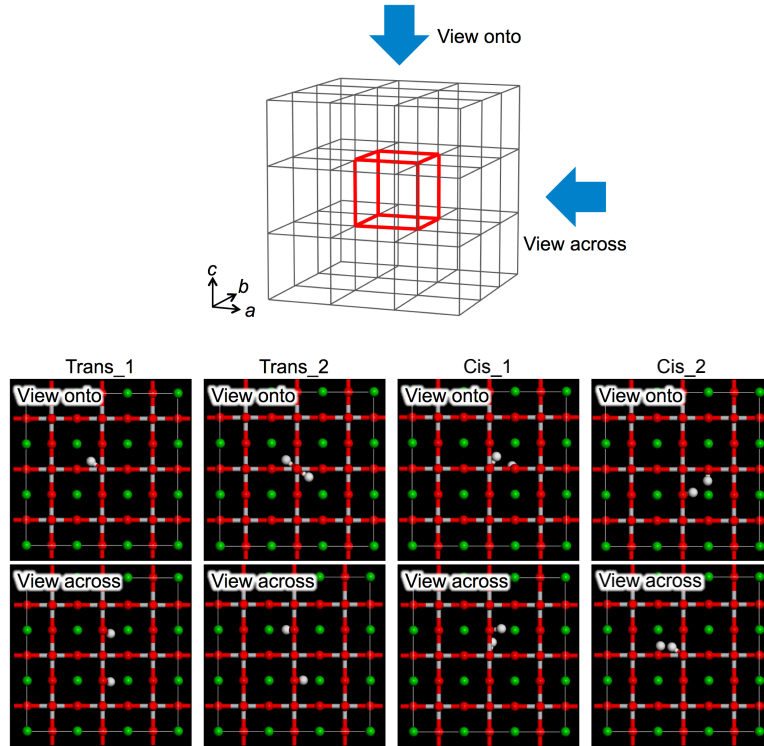

Figure S-1: All the possible patterns of *cis*- and *trans*-configurations in  $3 \times 3 \times 3$   $\text{Ba}_{1-0.5x}\text{TiO}_{3-x}\text{OH}_x$  supercell with  $x = 0.07$  substitution. The *trans*-models of *a*- and *c*-axis orientations were generated by changing the axial direction of the supercell without changing the atomic arrangement.

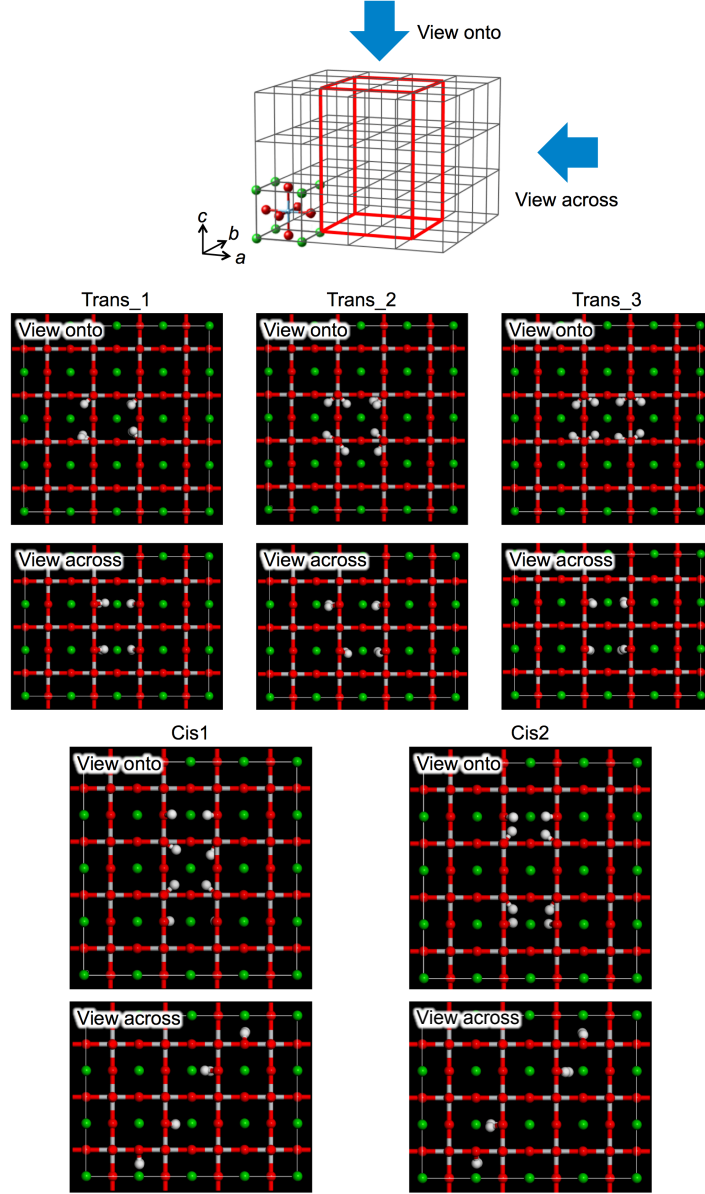

Figure S-2: All the possible patterns of *cis*- and *trans*-configurations in  $4 \times 4 \times 3$   $\text{Ba}_{1-0.5x}\text{TiO}_{3-x}\text{OH}_x$  supercell with  $x = 0.17$  substitution. The *trans*-models of *a*- and *c*-axis orientations were generated by changing the axial direction of the supercell without changing the atomic arrangement.

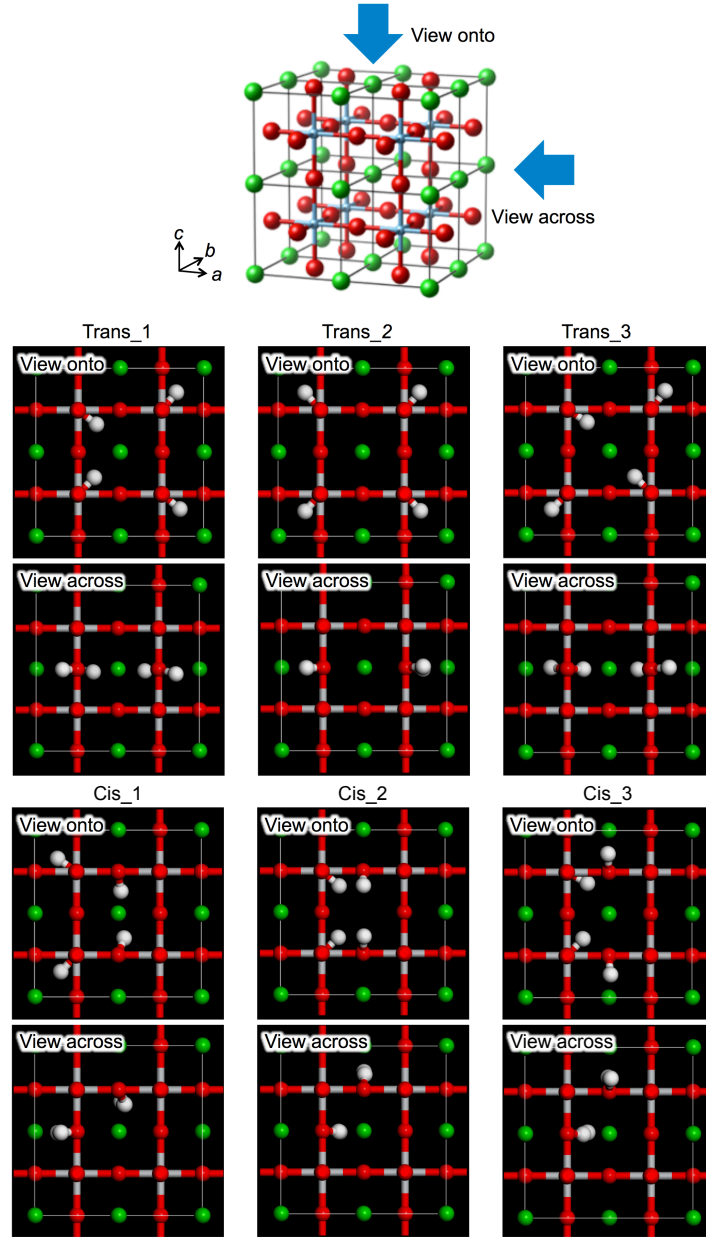

Figure S-3: All the possible patterns of *cis*- and *trans*-configurations in  $2 \times 2 \times 2$   $\text{Ba}_{1-0.5x}\text{TiO}_{3-x}\text{OH}_x$  supercell with  $x = 0.50$  substitution. The *trans*-models of *a*- and *c*-axis orientations were generated by changing the axial direction of the supercell without changing the atomic arrangement.

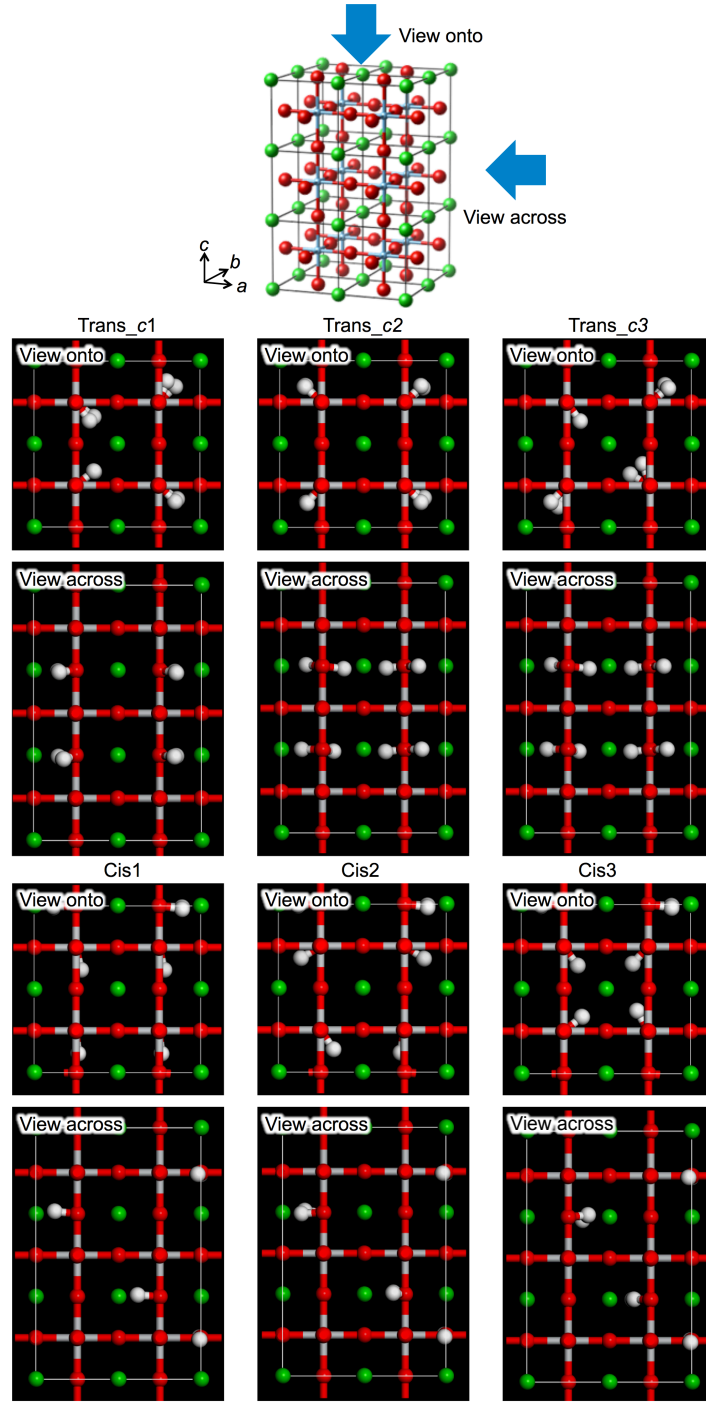

Figure S-4: All the possible patterns of *cis*- and *trans*-configurations in  $2 \times 2 \times 3$   $\text{Ba}_{1-0.5x}\text{TiO}_{3-x}\text{OH}_x$  supercell with  $x = 0.67$  substitution. The *trans*-models of *a*- and *c*-axis orientations were generated by changing the axial direction of the supercell without changing the atomic arrangement.
